## Extrapulmonary tuberculosis among migrants in the EU/EFTA: Implications for policy and practice

Sally Hayward

SE Hayward<sup>1,2</sup>, MJ van der Werf<sup>3</sup>, T Noori<sup>3</sup>, LB Nellums<sup>1,4</sup>, D Boccia<sup>2</sup>, JS Friedland<sup>1</sup>, S Hargreaves<sup>1</sup>

<sup>1</sup>Institute for Infection and Immunity, St George's, University of London, London, UK

<sup>2</sup>Faculty of Public Health and Policy, LSHTM, London, UK

<sup>3</sup>European Centre for Disease Prevention and Control, Solna, Sweden

<sup>4</sup>Division of Epidemiology & Public Health, University of Nottingham, Nottingham, UK

Contact: shayward@sgul.ac.uk

### Background:

The proportion of tuberculosis (TB) cases in the European Union/European Free Trade Association (EU/EFTA) that occur in migrants is increasing. Extrapulmonary TB poses challenges in diagnosis and treatment and causes serious morbidity and mortality. To date, there has been no in-depth exploration of extrapulmonary TB in migrants across Europe.

### Methods:

We analysed 22 years of data from the European Centre for Disease Prevention and Control's European Surveillance System (TESSy) for 32 EU/EFTA countries between 1995 and 2017. We investigated whether the proportion of TB cases that were extrapulmonary varied between migrants and non-migrants, and whether this varied by a) country/region of origin, b) reporting country/region, and c) site of disease.

### Results:

1,270,896 TB cases were included in the analysis, comprising 326,987 (25.7%) migrants, and 943,909 (74.3%) non-migrants. The proportion of TB that is extrapulmonary is significantly higher in migrants than in non-migrants: 45.2% (n = 147,814) of cases in migrants were extrapulmonary, compared to 21.7% (n = 204,613) in non-migrants ( $\chi^2=6.7 \times 10^4$ ,  $p < 0.001$ ). A relatively low proportion of extrapulmonary TB was seen in Eastern (17.4%) and Southern (29.6%) Europe compared with Western (35.7%) and Northern (41.8%) Europe, with migrants having a greater proportion of extrapulmonary TB only in Northern/Western Europe. Migrants from South-East Asia and Sub-Saharan Africa were at highest risk of extrapulmonary TB, with over half of all cases being extrapulmonary (62.0% and 54.5% respectively).

### Conclusions:

Among TB cases in the EU/EFTA, extrapulmonary disease is significantly more common in migrants than non-migrants, which has clinical and policy implications for patient detection and management. There is a need to improve clinical awareness of extrapulmonary TB, integrate detection of extrapulmonary TB into latent TB infection screening programmes, and harmonise data collection on migrant status in health systems.

### Key messages:

- Migrants in the EU/EFTA are disproportionately affected by extrapulmonary TB compared to non-migrants.
- This has clinical and policy implications for diagnosis, screening, and data collection.
